# Supplementary material for: Quercetin and Resveratrol Differentially Decrease Expression of the High-Affinity IgE Receptor (FcεRI) by Human and Mouse Mast Cells
Source: MDPI journal article supplement (doi:10.3390/molecules27196704), 2022-10-08
Supplement: s1 [file s1]

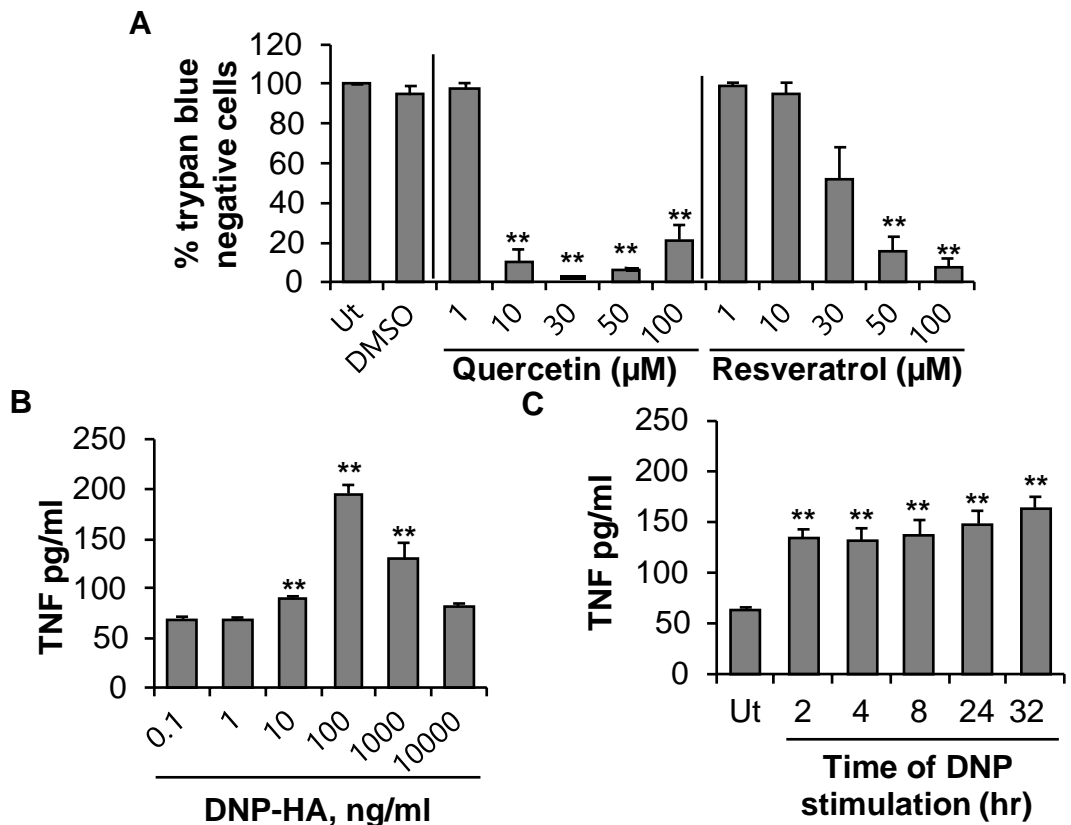

**Figure. S1: Effect of quercetin and resveratrol on MC/9 viability and optimization of TNF release.** (A) MC/9 were treated with 1, 10, 30, 50 or 100  $\mu$ M of quercetin, resveratrol or DMSO for 24 hr followed by trypan blue staining.  $n=3$ . (B) TNF release by MC/9 following stimulation with different concentrations of DNP-HA (0.1-10,000 ng/ml) for 20 hr at a cell density of  $1 \times 10^6$  cells/ml.  $n=3$ . (C) TNF release following 100 ng/ml DNP-HA stimulation for different time periods (2-32 hr). Untreated (Ut) represents 32 hr data point.  $n=3$ .  $p$  value  $<0.01$  (\*\*) is relative to 0.1 ng/ml DNP-HA (A, B) or Ut (C).

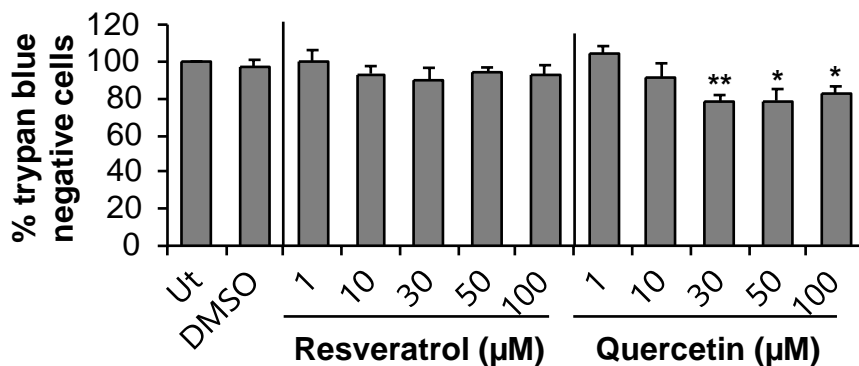

**Figure.S2. Effect of resveratrol and quercetin on BMMC viability.** BMMC were treated with 1, 10, 30, 50 or 100  $\mu$ M of the indicated flavonoids or DMSO for 24 hr followed by trypan blue staining. Ut represents untreated cells. n=5. *p* value <0.05 (\*) and <0.01 (\*\*) are relative to DMSO control.

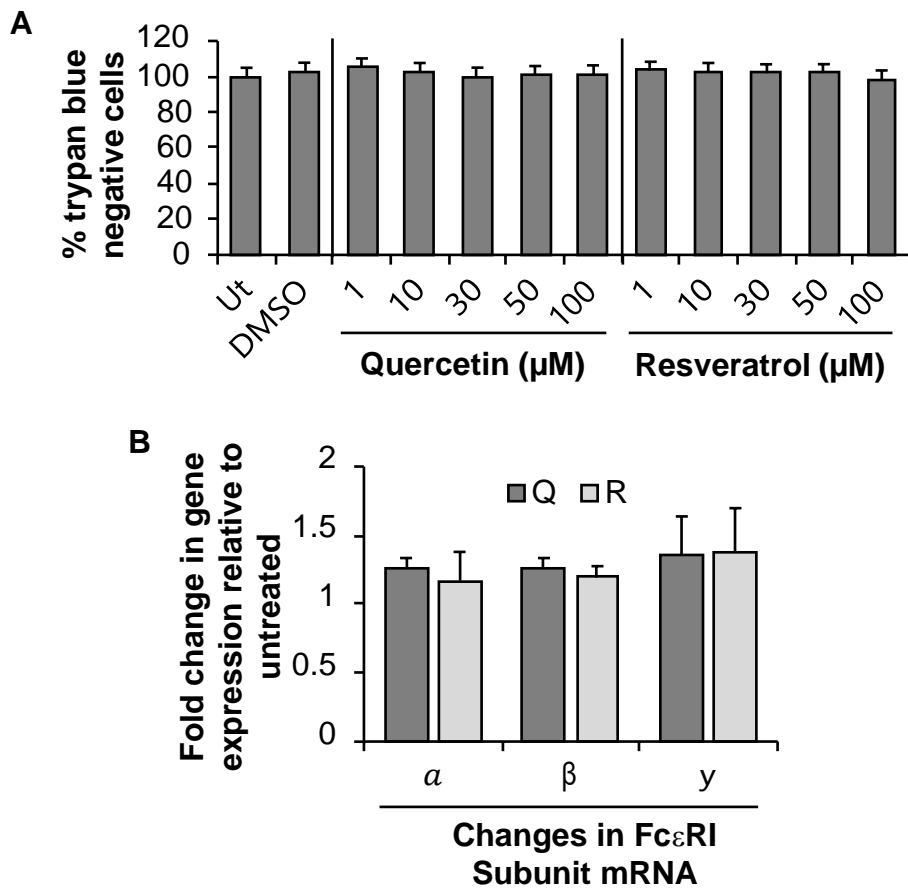

**Figure. S3. Effect of quercetin and resveratrol on LAD2 cell viability and Fc $\epsilon$ RI  $\alpha$ ,  $\beta$  and  $\gamma$  subunit mRNA expression.** (A) LAD2 were treated with 1, 10, 30, 50 or 100  $\mu$ M of the indicated flavonoids or DMSO for 24hr followed by trypan blue staining. Ut represents untreated cells.  $n=5$ .  $p$  value  $<0.05$  (\*) and  $<0.01$  (\*\*) are relative to DMSO control. (B) LAD2 were treated with 100  $\mu$ M quercetin (Q) or resveratrol (R) for 3 hr followed by RNA extraction, cDNA synthesis and qPCR using gene specific primers against human Fc $\epsilon$ RI  $\alpha$ ,  $\beta$  and  $\gamma$  subunits. Human GapDH was utilized as a housekeeping gene to normalize the samples.  $2^{-\Delta\Delta CT}$  value is plotted relative to untreated control.  $n=3$ .

**A**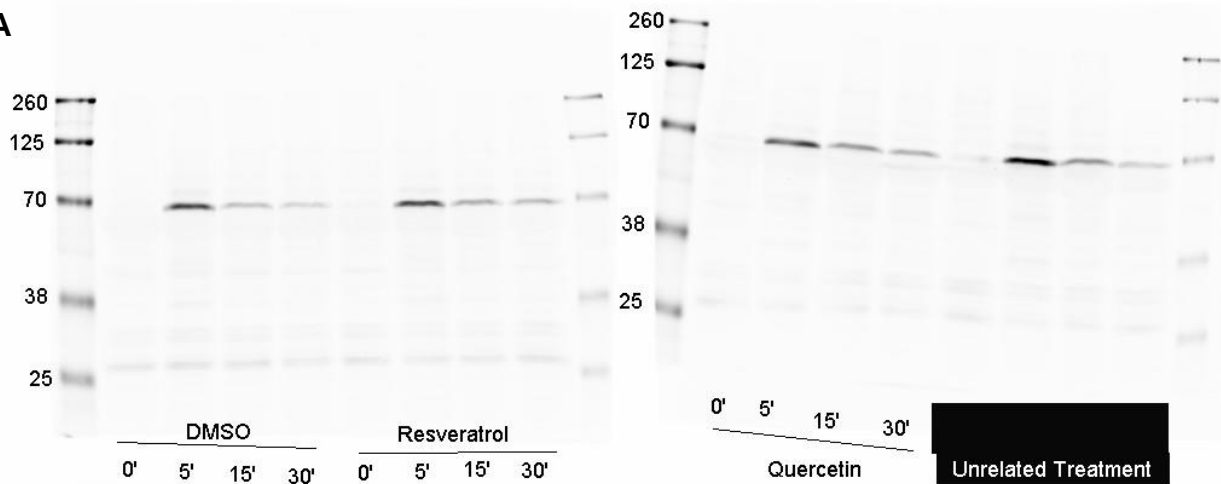**B**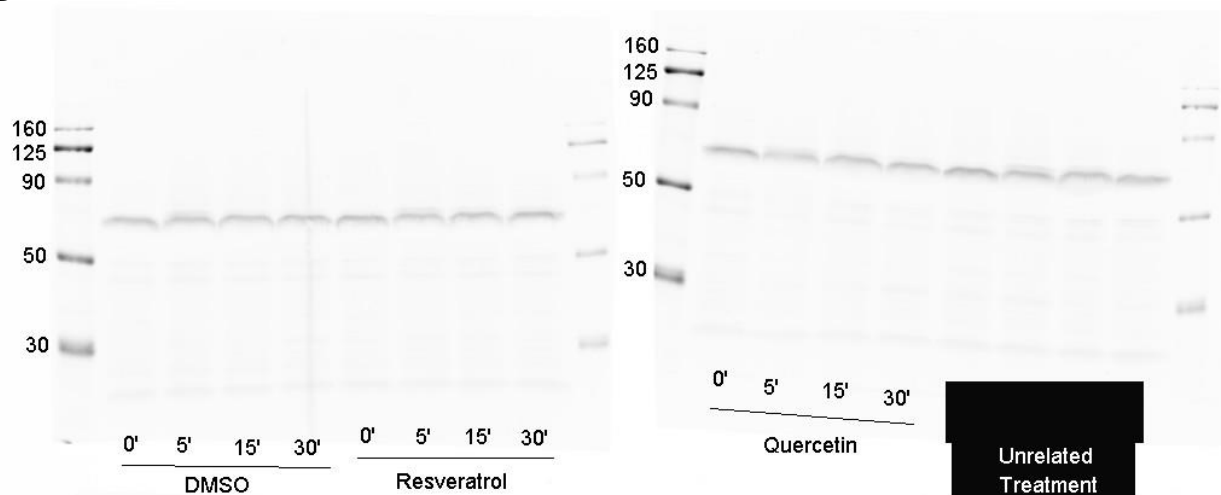

**Figure. S4. Full blots for figures 4A.** Full western blot images for phospho-SYK (A), and total SYK (B) from figure 4A. Numbers beside ladders indicate predicted size of each MW marker in kDa.

**A**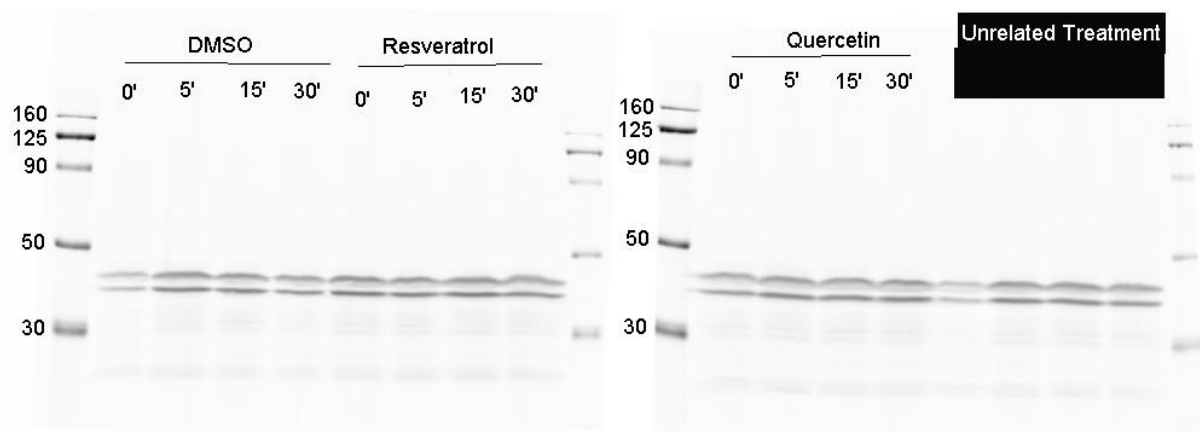**B**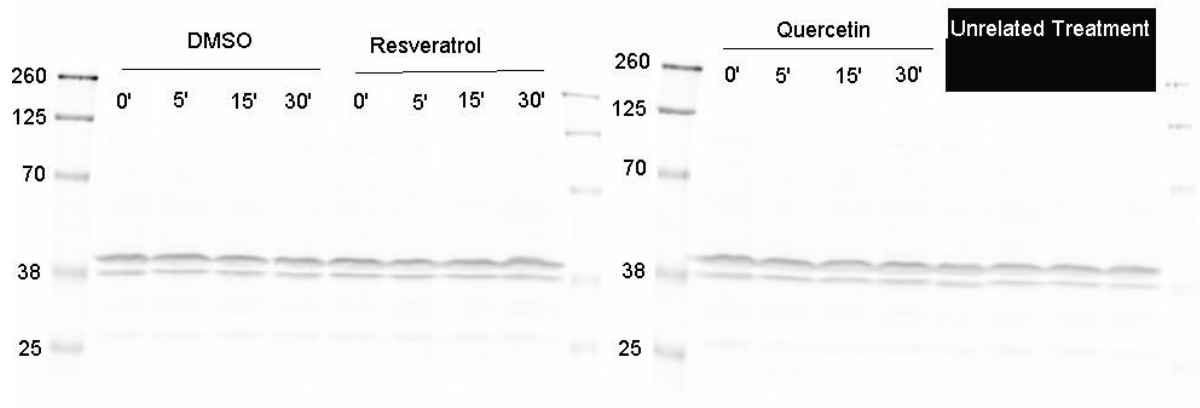

**Figure. S5. Full blots for figures 4B.** Full western blot images for phospho-ERK (A), and total ERK (B) from figure 4B. Numbers beside ladders indicate predicted size of each MW marker in kDa.

**A**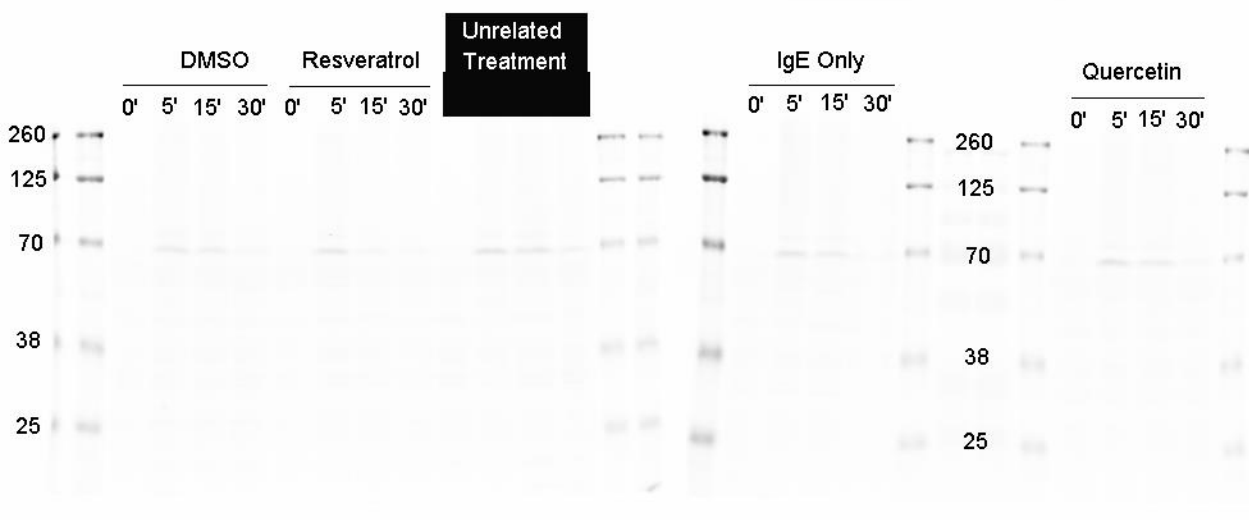**B**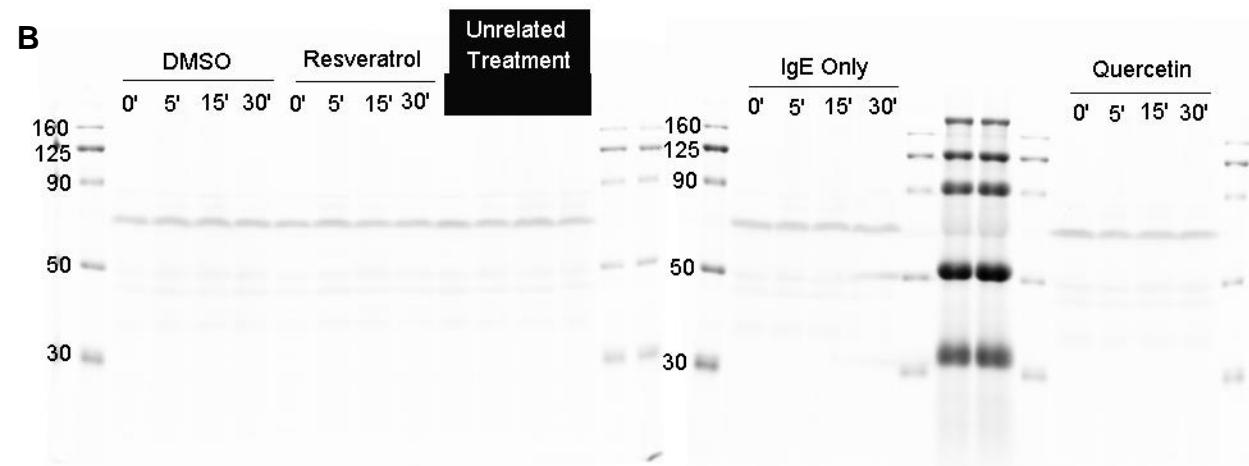

**Figure. S6. Full blots for figures 6A.** Full western blot images for phospho-SYK (A), total SYK (B) from figure 6A. Numbers beside ladders indicate predicted size of each MW marker in kDa.

**A**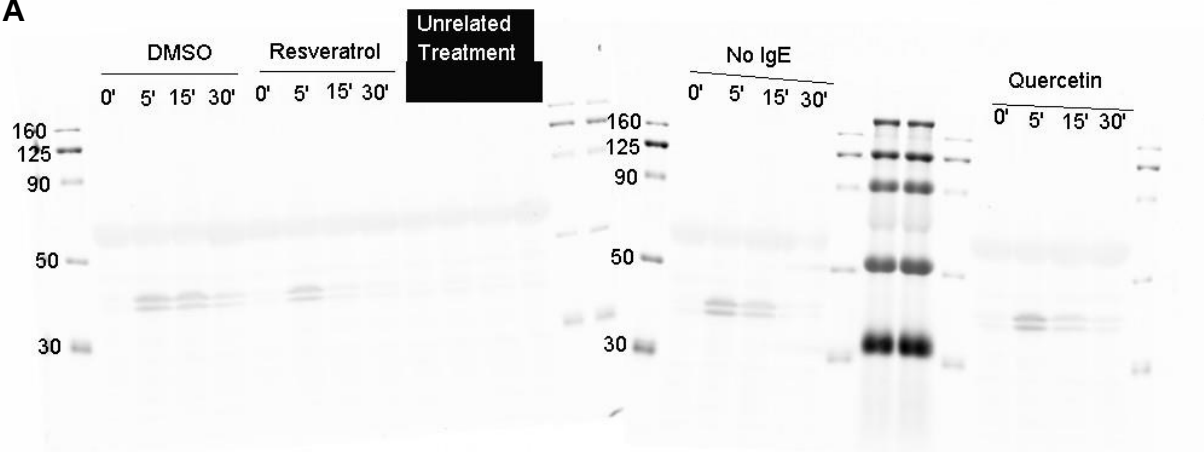**B**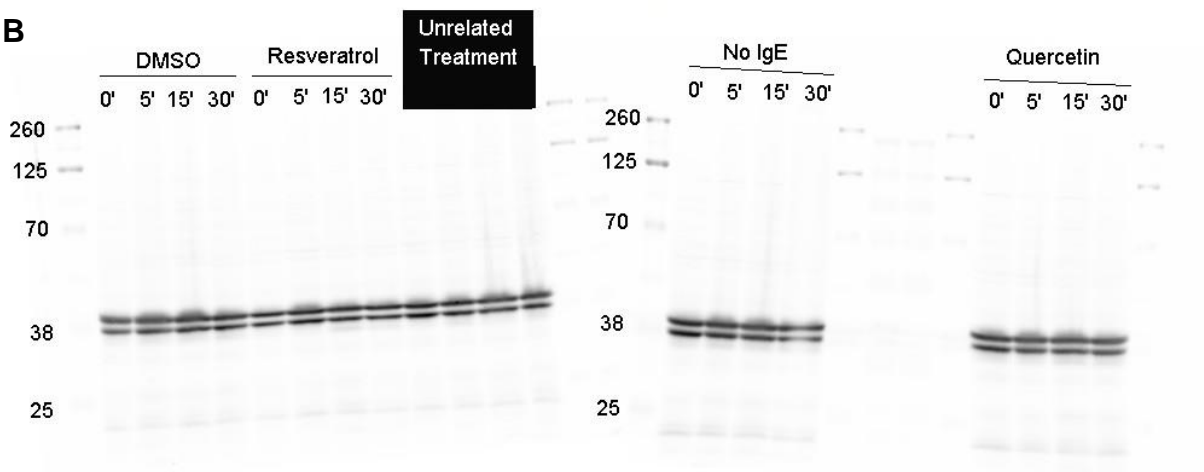

**Figure. S7. Full blots for figures 6B.** Full western blot images for phospho-ERK (A), and total ERK (B) from figure 6B. Numbers beside ladders indicate predicted size of each MW marker in kDa.
